# Supplementary material for: A deep transcriptomic analysis of pod development in the vanilla orchid (Vanilla planifolia)
Source: PubMed Central journal article supplement (PMC4233054; doi:10.1186/1471-2164-15-964), 2014-11-07

A

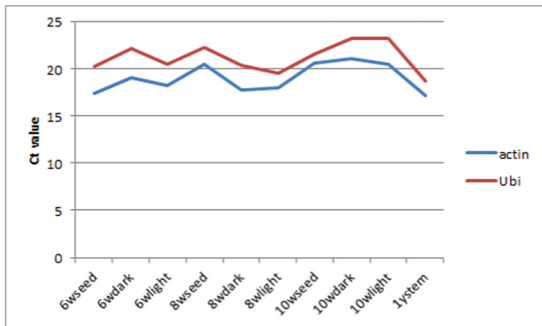

B

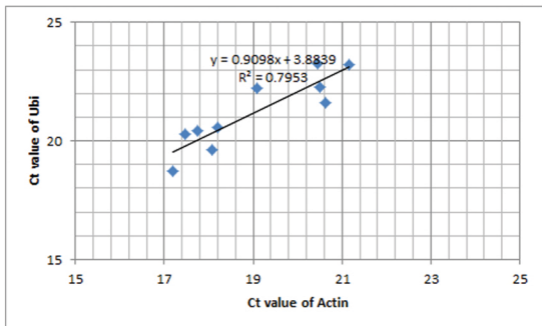

Supplement: 12864_2014_6656_MOESM11_ESM.pdf [file 12864_2014_6656_MOESM11_ESM.pdf]
