# Supplementary material for: A deep transcriptomic analysis of pod development in the vanilla orchid (Vanilla planifolia)
Source: PubMed Central journal article supplement (PMC4233054; doi:10.1186/1471-2164-15-964), 2014-11-07

## A. 6W seed

### biological\_process Level 3

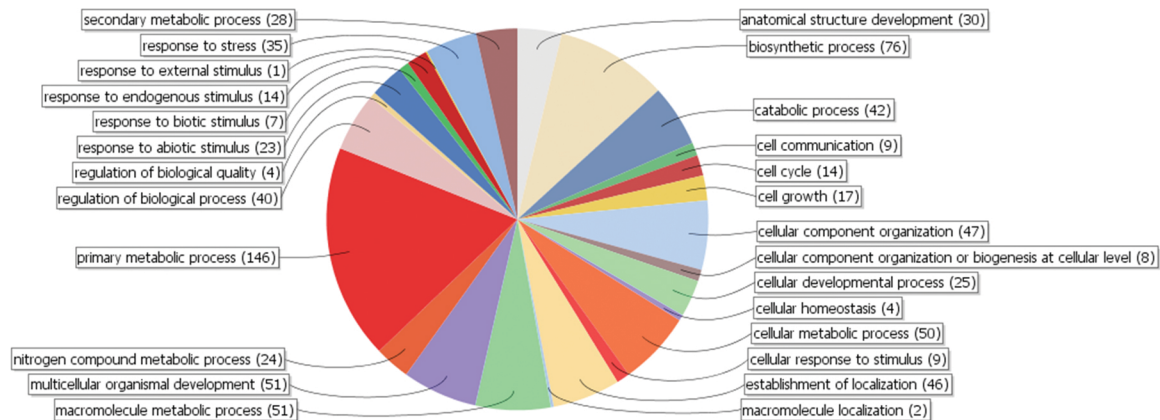

## B. Aerial root

### biological\_process Level 3

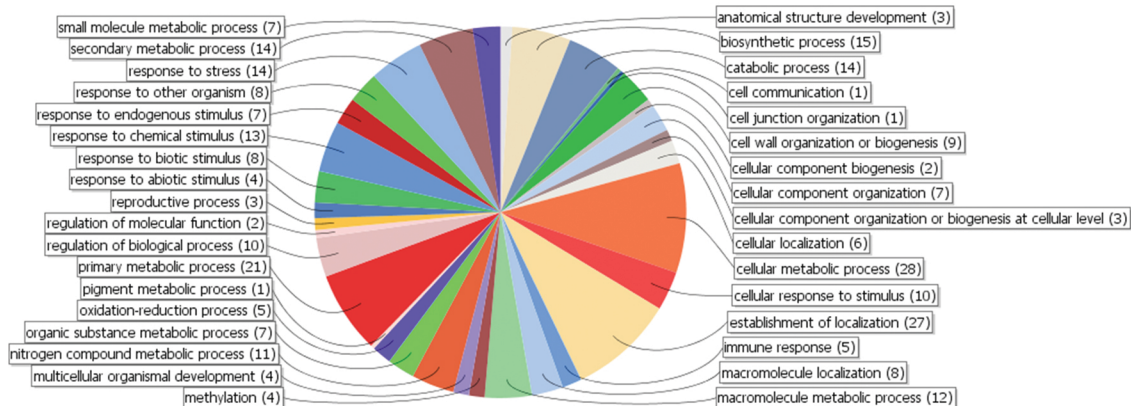

Supplement: 12864_2014_6656_MOESM13_ESM.pdf [file 12864_2014_6656_MOESM13_ESM.pdf]
